# Supplementary material for: Direct observation of pressure-induced amorphization of methane/ethane hydrates using Raman and infrared spectroscopy
Source: Royal Society of Chemistry journal article supplement (doi:10.1039/d3cp03096b), 2023-01-01
Supplement: d3cp03096b1.pdf [file d3cp03096b1.pdf]

## Supplementary information

### Direct observation of pressure-induced amorphization of methane/ethane hydrates using Raman and infrared spectroscopy

Naoki Noguchi,<sup>a\*</sup> Yui Shiraishi,<sup>a</sup> Maho Kageyama,<sup>a</sup> Yuu Yokoi,<sup>a</sup> Saki Kurohama,<sup>a</sup> Natsuki Okada,<sup>a</sup>  
and Hidekazu Okamura<sup>a</sup>

<sup>a</sup> *Graduate School of Technology, Industrial and Social Sciences, Tokushima University, 2-1  
Minami-josanjima-cho, Tokushima 770-8506, Japan*

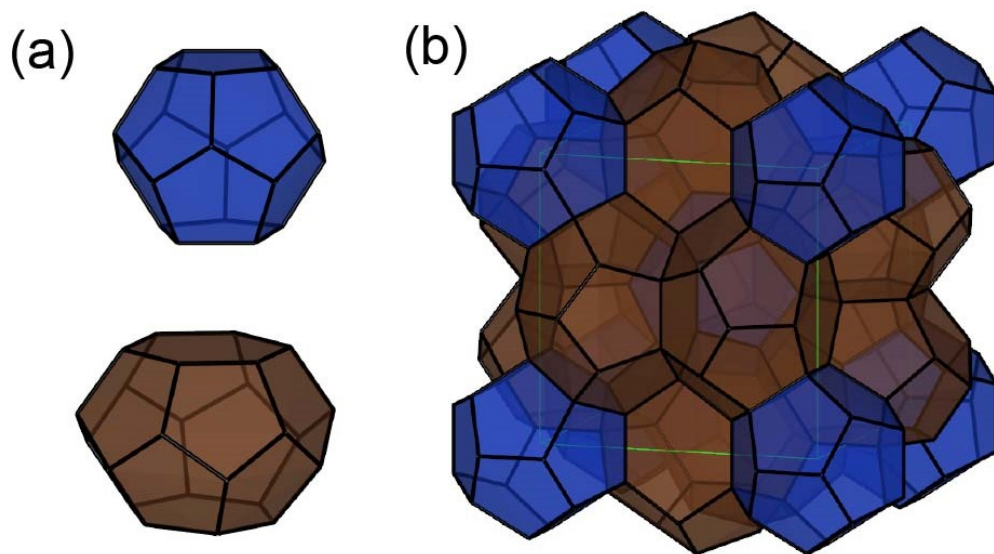

**Fig. S1** Crystal structure of the type I clathrate hydrate.<sup>S1</sup> (a) Two cages in the type I clathrate hydrate: small (pentagonal dodecahedron,  $5^{12}$ ) cage (blue) and large (tetrakaidecahedron,  $5^{12}6^2$ ) cage (brown). (b) Unit cell composed of two small cages and six large cages.

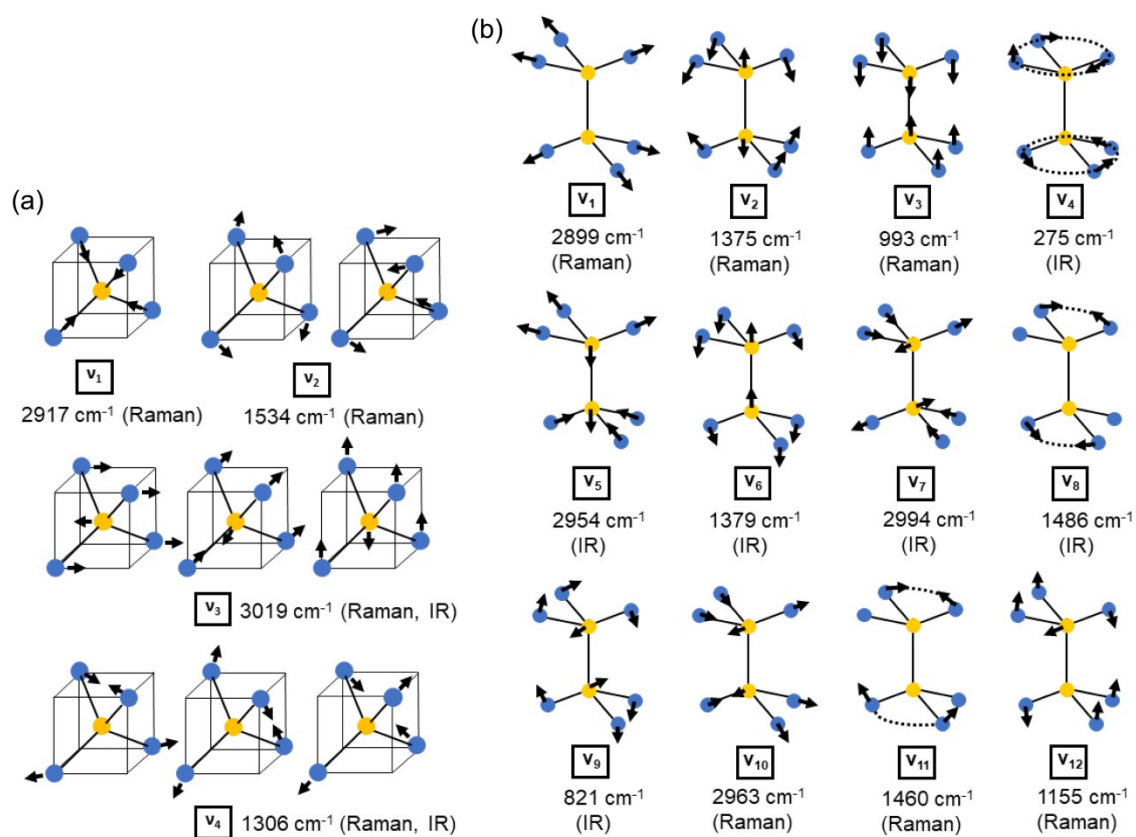

**Fig. S2** Normal modes of the methane (a) and ethane molecules (b). The frequencies for the free molecules and Raman and IR activity are shown.<sup>S2</sup> In the figures “Raman” and “IR” indicate Raman and IR activity, respectively.

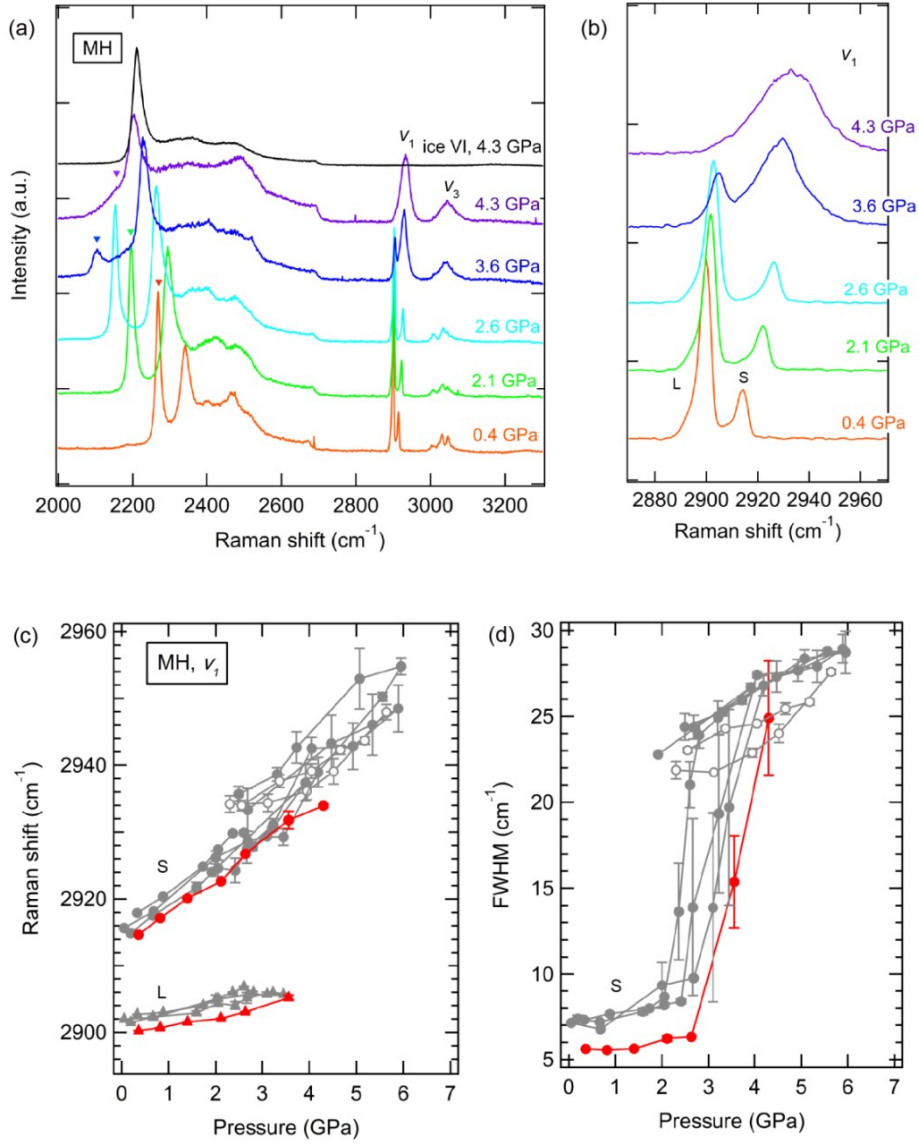

**Fig. S3** Raman spectra of MH on the isothermal compression at 10 K. (a) Selected spectra of the OD and CH stretching ( $\nu_1$ ,  $\nu_3$ ) modes. The OD stretching bands of MH are marked with reverse triangles. (b) Magnified view around the  $\nu_1$  mode. (c) Peak wavenumbers of the  $\nu_1$  Raman bands as a function of pressure at 10 K. (d) FWHM of the  $\nu_1$  Raman bands of the methane molecule in the small cage as a function of pressure at 10 K. In (c) and (d), gray points show the dataset at 100 K (Fig. 3).

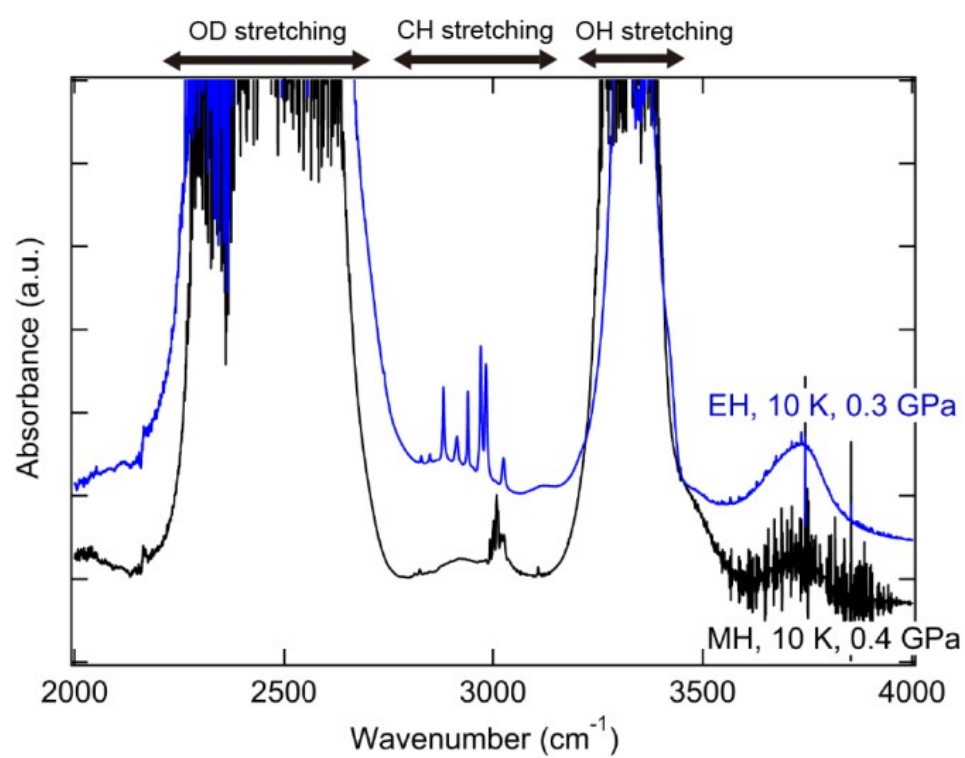

**Fig. S4** IR spectra of MH and EH at 2000–4000  $\text{cm}^{-1}$ .

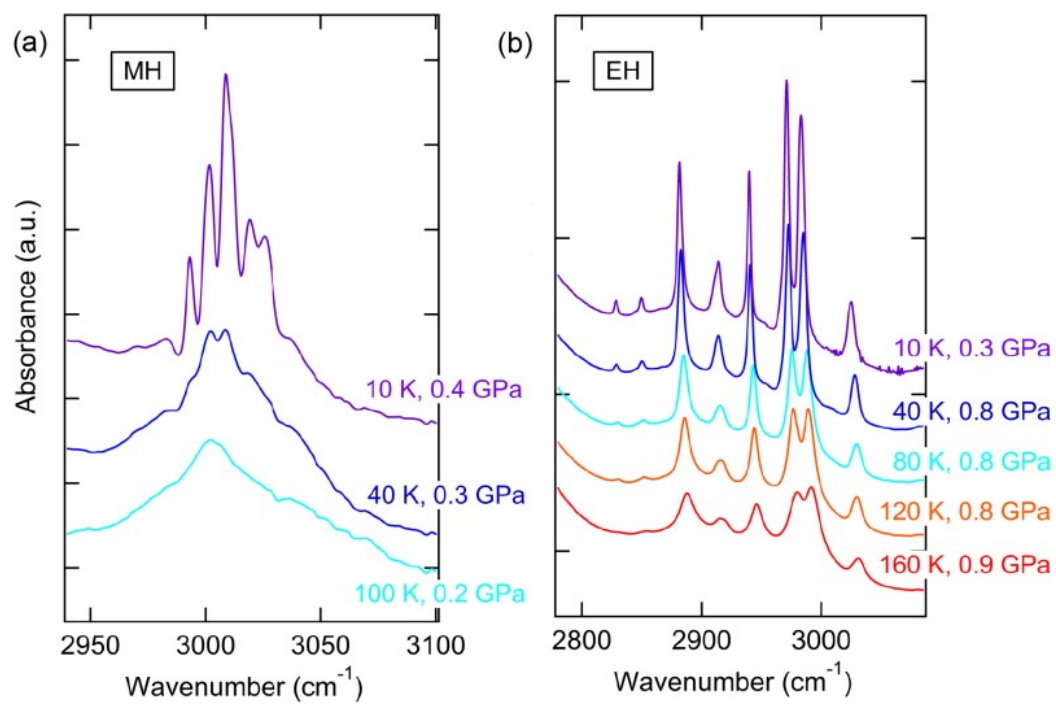

**Fig. S5** IR spectra of the CH stretching modes of MH (a) and EH (b) on cooling.

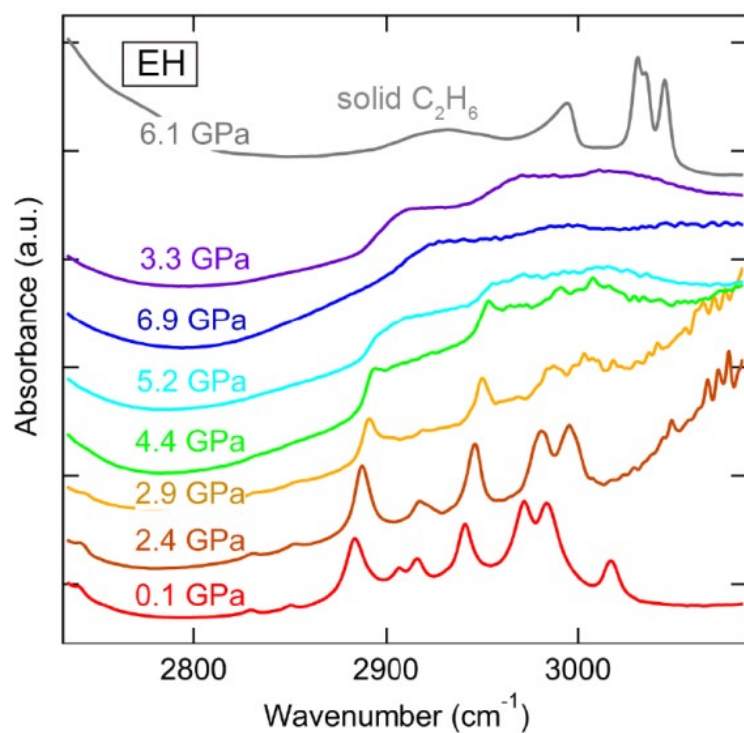

**Fig. S6** IR spectra showing the CH stretching mode of EH on the isothermal compression at 100

K. The spectrum of solid ethane is also shown.

## References

- S1 K. Momma and F. Izumi, *J. Appl. Crystallogr.*, 2011, **44**, 1272–1276.
- S2 K. Nakamoto, *Infrared and Raman Spectra of Inorganic and Coordination Compounds*,  
*Part A: Theory and Applications in Inorganic Chemistry*, John Wiley & Sons, New Jersey, 2009.
